# Supplementary material
Source: PubMed Central journal article supplement (PMC6715613)
Supplement: BPH-176-3585-s001.pdf [file BPH-176-3585-s001.pdf]

**TABLE 1 SUPPORTING INFORMATION**

**Effect of FDA-approved AD therapeutics on astrocyte function.** \*For mild-to-moderate AD diagnoses; #For moderate-to-severe AD diagnoses; ‡Determined post-hoc as data was derived from bulk RNAseq; Pre-treated, simultaneous treat, or treated after establishing the model/system paradigm; ↑, increase; ↓, decrease; ≈, no change; ACh, acetylcholine; AChE (*AChE*), acetylcholinesterase; AD, Alzheimer’s disease; APP/PS1, APP Swedish mutation/presenilin 1; APP<sup>swe</sup>, APP Swedish mutation; BDNF, brain-derived neurotrophic factor; BMP-4, bone morphogenic protein 4; BuChE, butyrylcholinesterase; CCL20, chemokine ligand 20; ChAT, choline acetyltransferase; CXCL10, C-X-C motif chemokine 10; FAD, familial Alzheimer’s disease; GDNF, glial cell-derived neurotrophic factor; GFAP, glial fibrillary acidic protein; GLT, glutamate transporter; IBA1, ionized calcium binding adaptor molecule 1; IGF-1, insulin-like growth factor 1; IL, interleukin; IFN $\gamma$ , interferon gamma; LPS, lipopolysaccharide; NGF, nerve growth factor; NMDAR, *N*-methyl-D-aspartate receptor; TNF $\alpha$ , tumour necrosis factor alpha.

| Drug Class                       | Drug Name                 | Mechanism of Action                                                                                                                                                                                                                                                                                                                                  | Direct Effect                                                                                                                                                        | Indirect Effect                              |
|----------------------------------|---------------------------|------------------------------------------------------------------------------------------------------------------------------------------------------------------------------------------------------------------------------------------------------------------------------------------------------------------------------------------------------|----------------------------------------------------------------------------------------------------------------------------------------------------------------------|----------------------------------------------|
| Acetylcholinesterase inhibitors* | Donepezil                 | A reversible cholinesterase inhibitor that functions through both competitive and non-competitive mechanisms; Allosterically modulates enzyme activity; Only inhibits AChE (Francis, Palmer et al., 1999; Lanctôt, Herrmann et al., 2003; McGleenon, Dynan et al., 1999)                                                                             | ↓ intracellular Ca <sup>2+</sup> (Makitani, Nakagawa et al., 2017)<br>↓ reactive oxygen species (Makitani, Nakagawa et al., 2017)                                    |                                              |
|                                  | Galantamine               | A cholinesterase inhibitor that modulates nicotinic receptors through allosteric interactions (Lanctôt, Herrmann et al., 2003; Wu, Zhao et al., 2015)                                                                                                                                                                                                | ↓ morphological changes (Wu, Zhao et al., 2015)<br>↓ / ≈ GFAP (Unger, Svedberg et al., 2006; Wu, Zhao et al., 2015)<br>↓ TNF $\alpha$ , IL-6 (Wu, Zhao et al., 2015) |                                              |
|                                  | Rivastigmine              | A pseudo-irreversible cholinesterase inhibitor; Once cleaved by AChE, the enzyme becomes covalently modified, thereby preventing ACh hydrolysis for several hours even once this chemical is eliminated from the plasma (Francis, Palmer et al., 1999; McGleenon, Dynan et al., 1999); Inhibits both AChE and BuChE (Lanctôt, Herrmann et al., 2003) | ↓ GFAP (Mohamed, Keller et al., 2016)                                                                                                                                |                                              |
|                                  | Other AChEI (Metrifonate) | An irreversible cholinesterase inhibitor                                                                                                                                                                                                                                                                                                             | ↑ NGF, BDNF (Mele & Juric, 2014)                                                                                                                                     |                                              |
|                                  | ACh receptor              |                                                                                                                                                                                                                                                                                                                                                      | ↑ GDNF (Liu, Zeng et al., 2015)<br>↓ oxidative stress-induced apoptosis                                                                                              | ↓ IBA1 in microglia (Liu, Zeng et al., 2015) |

|                               |                                             |                                                                                                                                                                                                                                         |                                                                                                                                                                                                                                                                                                                                                                                                                                                                         |                                                                                                                                                |
|-------------------------------|---------------------------------------------|-----------------------------------------------------------------------------------------------------------------------------------------------------------------------------------------------------------------------------------------|-------------------------------------------------------------------------------------------------------------------------------------------------------------------------------------------------------------------------------------------------------------------------------------------------------------------------------------------------------------------------------------------------------------------------------------------------------------------------|------------------------------------------------------------------------------------------------------------------------------------------------|
|                               | <i>agonist</i>                              |                                                                                                                                                                                                                                         | <p>(Liu, Zeng et al., 2015)</p> <p>↓ GFAP (Liu, Zeng et al., 2015)</p> <p>↓ Caspase-9 (Liu, Zeng et al., 2015)</p> <p>↓ IL-6, TNF<math>\alpha</math>, IL-1<math>\beta</math>, IL-8, IL-13 (Revathikumar, Bergqvist et al., 2016)</p> <p>↓ BuChE (Revathikumar, Bergqvist et al., 2016)</p> <p>≈ IFN<math>\gamma</math>, IL-2, IL-44, IL-10, IL-12p70 (Revathikumar, Bergqvist et al., 2016)</p> <p>↓ NF-<math>\kappa</math>B pathway (Patel, McIntire et al., 2017)</p> | <p>↑ anti-inflammatory/<br/>neuroprotective effects in<br/>microglia (Revathikumar,<br/>Bergqvist et al., 2016)</p>                            |
| NMDAR antagonist <sup>#</sup> | Memantine                                   | An uncompetitive antagonist that preferentially binds to NMDAR after excessive glutamate activation, thereby allowing normal levels of glutamate-based synaptic transmission to occur without inhibition (Reisberg, Doody et al., 2003) | <p>≈ GFAP (Unger, Svedberg et al., 2006)</p> <p>↓ CCL20, CXCL10, BMP-4 (Suhs, Gudi et al., 2016)</p> <p>↑ IGF-1 (Suhs, Gudi et al., 2016)</p> <p>↓ intracellular Ca<sup>2+</sup> (Lee, Ting et al., 2010)</p>                                                                                                                                                                                                                                                           |                                                                                                                                                |
|                               | <i>Other NMDAR antagonist</i><br>(Riluzole) |                                                                                                                                                                                                                                         | <p>↑ GLT-1 (Carbone, Duty et al., 2012)</p> <p>↑ glutamate uptake (Carbone, Duty et al., 2012; Yoshizumi, Eisenach et al., 2012)</p> <p>↑ NGF, BDNF, GDNF (Mizuta, Ohta et al., 2001)</p> <p>≈ / ↓ Modest return to baseline levels of astrocyte-specific transcripts<sup>‡</sup> (Okamoto, Gray et al., 2018)</p> <p>↑ intracellular Ca<sup>2+</sup> stores (Yoshizumi, Eisenach et al., 2012)</p> <p>↑ glutamate release? (Yoshizumi, Eisenach et al., 2012)</p>      | <p>↓ Modest return to baseline levels of microglia-specific transcripts (especially DAM profiles)<sup>‡</sup> (Okamoto, Gray et al., 2018)</p> |

Rodent and human models used to investigate AD function:

| Species | Technique                     | Model                                                                | Age         | Brain Area Assessed    | Citation                                               |
|---------|-------------------------------|----------------------------------------------------------------------|-------------|------------------------|--------------------------------------------------------|
| Mouse   | Dissociated culture           | C57BL/6 black treated with 500 $\mu$ M H <sub>2</sub> O <sub>2</sub> | Neonate     | Midbrain               | (Liu, Zeng et al., 2015)                               |
|         |                               | ICR                                                                  | Neonate     | Whole brain            | (Mizuta, Ohta et al., 2001)                            |
|         |                               | C57BL/6 black stimulated with 60 ng/mL LPS                           | Neonate     | Cortex                 | (Patel, McIntire et al., 2017)                         |
|         |                               | E15/E16 Swiss cultured without growth factors for 3 day              | Embryonic   | Midbrain               | (Carbone, Duty et al., 2012)                           |
|         |                               | ChAT promoter transgenic                                             | 1 month     | Hippocampus            | (Pabst, Braganza et al., 2016)                         |
|         |                               | 5X FAD                                                               | 6 month     | Cortex<br>Hippocampus  | (Okamoto, Gray et al., 2018)                           |
|         | Brain slice and/or sectioning | C57BL/6 black                                                        | Unspecified | Hippocampus            | (Navarrete, Perea et al., 2012)                        |
|         |                               | ChAT promoter transgenic                                             | 1 month     | Hippocampus            | (Pabst, Braganza et al., 2016)                         |
|         |                               | APP <sup>swe</sup> transgenic                                        | 8 month     | Hippocampus            | (Mohamed, Keller et al., 2016)                         |
|         |                               |                                                                      | 10 month    | Cortex                 | (Unger, Svedberg et al., 2006)                         |
|         | In vivo                       | ChAT promoter transgenic                                             | 7-10 week   | Hippocampus            | (Pabst, Braganza et al., 2016)                         |
|         |                               | APP/PS1                                                              | 10 month    | Hippocampus            | (Wu, Zhao et al., 2015)                                |
| Rat     | Dissociated astrocyte culture | Wistar Hannover                                                      | Neonate     | Cortex                 | (Mele & Juric, 2014; Yoshizumi, Eisenach et al., 2012) |
|         |                               | Wistar Hannover treated with 1 $\mu$ M bradykinin                    | Neonate     | Cortex                 | (Makitani, Nakagawa et al., 2017)                      |
|         | Dissociated culture           | Wistar Hannover treated with 100 ng/mL LPS or 100 ng/mL TNF $\alpha$ | Neonate     | Cerebrum               | (Suhs, Gudi et al., 2016)                              |
|         | Brain slice and/or sectioning | Wistar Hannover                                                      | 3-4 month   | Hippocampus            | (Navarrete, Perea et al., 2012)                        |
| Human   | Dissociated astrocyte culture | IL-1 $\beta$ stimulated                                              | Foetal      | Unspecified            | (Revathikumar, Bergqvist et al., 2016)                 |
|         |                               | 500 $\mu$ M glutamate and/or 500 nM QUIN stimulated                  | Foetal      | Cerebrum               | (Lee, Ting et al., 2010)                               |
|         |                               | 500 $\mu$ M glutamate and/or 500 nM QUIN stimulated                  | Adult       | Cerebrum               | (Lee, Ting et al., 2010)                               |
|         | Brain slice and/or sectioning | Autopsy                                                              | Adult       | Cortex,<br>Hippocampus | (Teaktong, Graham et al., 2003)                        |

Overview of drug treatments tested in pre-clinical setting:

| <b>Reagent</b>                                                    | <b>Concentration</b>                           | <b>Duration of Treatment</b> | <b>Citation</b>                                                |
|-------------------------------------------------------------------|------------------------------------------------|------------------------------|----------------------------------------------------------------|
| Donepezil                                                         | 10 $\mu$ M                                     | 24 hours                     | (Makitani, Nakagawa et al., 2017)                              |
| Galantamine                                                       | 2 mg/kg                                        | 10 day                       | (Unger, Svedberg et al., 2006)                                 |
|                                                                   | 5 mg/kg                                        | 8 weeks, 2X per day          | (Wu, Zhao et al., 2015)                                        |
| Rivastigmine                                                      | 0.3 mg/kg                                      | 8 weeks                      | (Mohamed, Keller et al., 2016)                                 |
| <i>Other AChEI</i><br>(Metrifonate)                               | 1 nM-100 $\mu$ M; maximum effect at 10 $\mu$ M | 24 hours                     | (Mele & Juric, 2014)                                           |
| <i>ACh receptor agonist</i><br>(Nicotine)                         | 1 $\mu$ M                                      |                              | (Revathikumar, Bergqvist et al., 2016)                         |
|                                                                   | 10 $\mu$ M                                     | 24 hours                     | (Liu, Zeng et al., 2015; Revathikumar, Bergqvist et al., 2016) |
|                                                                   | 100 $\mu$ M                                    |                              | (Revathikumar, Bergqvist et al., 2016)                         |
| <i>ACh receptor agonist</i><br>(GTS21)                            | 30 $\mu$ M                                     | 1 hour                       | (Patel, McIntire et al., 2017)                                 |
| <i>ACh receptor stimulation</i><br>(electric pulse; optogenetics) |                                                |                              | (Navarrete, Perea et al., 2012; Pabst, Braganza et al., 2016)  |
| Memantine                                                         | 20 $\mu$ M                                     | 5 minutes                    | (Lee, Ting et al., 2010)                                       |
|                                                                   | 0.1-100 $\mu$ M                                | 12-24 hours                  | (Suhs, Gudi et al., 2016)                                      |
|                                                                   | 10 mg/kg                                       | 10 days                      | (Unger, Svedberg et al., 2006)                                 |
| <i>Other NMDAR antagonist</i><br>(Riluzole)                       | 1 $\mu$ M                                      | 5 minutes                    | (Yoshizumi, Eisenach et al., 2012)                             |
|                                                                   | 100 $\mu$ M                                    | 3 days                       | (Carbone, Duty et al., 2012)                                   |
|                                                                   | 426 $\mu$ M                                    | 24 hours                     | (Mizuta, Ohta et al., 2001)                                    |
|                                                                   | 13 mg/kg                                       | 5 months                     | (Okamoto, Gray et al., 2018)                                   |

## REFERENCES FOR SUPPORTING INFORMATION

- Carbone, M., Duty, S., & Rattray, M. (2012). Riluzole elevates GLT-1 activity and levels in striatal astrocytes. *Neurochemistry International*, 60(1), 31-38. doi:10.1016/j.neuint.2011.10.017
- Francis, P. T., Palmer, A. M., Snape, M., & Wilcock, G. K. (1999). The cholinergic hypothesis of Alzheimer's disease: a review of progress. *Journal of Neurology, Neurosurgery, and Psychiatry*, 66, 137-147.
- Lanctôt, K. L., Herrmann, N., Yau, K. K., Khan, L. R., Liu, B. A., LouLou, M. M., et al. (2003). Efficacy and safety of cholinesterase inhibitors in Alzheimer's disease: A meta-analysis. *Canadian Medical Association Journal*, 169(6), 557-564.
- Lee, M. C., Ting, K. K., Adams, S., Brew, B. J., Chung, R., & Guillemain, G. J. (2010). Characterisation of the expression of NMDA receptors in human astrocytes. *PloS one*, 5(11), e14123. doi:10.1371/journal.pone.0014123
- Liu, Y., Zeng, X., Hui, Y., Zhu, C., Wu, J., Taylor, D. H., et al. (2015). Activation of alpha7 nicotinic acetylcholine receptors protects astrocytes against oxidative stress-induced apoptosis: implications for Parkinson's disease. *Neuropharmacology*, 91, 87-96. doi:10.1016/j.neuropharm.2014.11.028
- Makitani, K., Nakagawa, S., Izumi, Y., Akaike, A., & Kume, T. (2017). Inhibitory effect of donepezil on bradykinin-induced increase in the intracellular calcium concentration in cultured cortical astrocytes. *Journal of Pharmacological Sciences*, 134(1), 37-44. doi:10.1016/j.jpsh.2017.03.008
- McGleenon, B. M., Dynan, K. B., & Passmore, A. P. (1999). Acetylcholinesterase inhibitors in Alzheimer's disease. *British Journal of Clinical Pharmacology*, 48, 471-480.
- Mele, T., & Juric, D. M. (2014). Metrifonate, like acetylcholine, up-regulates neurotrophic activity of cultured rat astrocytes. *Pharmacological Reports*, 66(4), 618-623. doi:10.1016/j.pharep.2014.02.025
- Mizuta, I., Ohta, M., Ohta, K., Nishimura, M., Mizuta, E., & Kuno, S. (2001). Riluzole stimulates nerve growth factor, brain-derived neurotrophic factor and glial cell line-derived neurotrophic factor synthesis in cultured mouse astrocytes. *Neuroscience Letters*, 310, 117-120.
- Mohamed, L. A., Keller, J. N., & Kaddoumi, A. (2016). Role of P-glycoprotein in mediating rivastigmine effect on amyloid-beta brain load and related pathology in Alzheimer's disease mouse model. *Biochimica et biophysica acta*, 1862(4), 778-787. doi:10.1016/j.bbadis.2016.01.013
- Navarrete, M., Perea, G., Fernandez de Sevilla, D., Gomez-Gonzalo, M., Nunez, A., Martin, E. D., et al. (2012). Astrocytes mediate in vivo cholinergic-induced synaptic plasticity. *PLoS Biol*, 10(2), e1001259. doi:10.1371/journal.pbio.1001259
- Okamoto, M., Gray, J. D., Larson, C. S., Kazim, S. F., Soya, H., McEwen, B. S., et al. (2018). Riluzole reduces amyloid beta pathology, improves memory, and restores gene expression changes in a transgenic mouse model of early-onset Alzheimer's disease. *Translational Psychiatry*, 8(1), 153. doi:10.1038/s41398-018-0201-z
- Pabst, M., Braganza, O., Dannenberg, H., Hu, W., Pothmann, L., Rosen, J., et al. (2016). Astrocyte intermediaries of septal cholinergic modulation in the hippocampus. *Neuron*, 90(4), 853-865. doi:10.1016/j.neuron.2016.04.003
- Patel, H., McIntire, J., Ryan, S., Dunah, A., & Loring, R. (2017). Anti-inflammatory effects of astroglial alpha7 nicotinic acetylcholine receptors are mediated by inhibition of the NF-kappaB pathway and activation of the Nrf2 pathway. *Journal of Neuroinflammation*, 14(1), 192. doi:10.1186/s12974-017-0967-6
- Reisberg, B., Doody, R., Stöffler, A., Schmitt, F., Ferris, S., & Möbius, H. J. (2003). Memantine in moderate-to-severe Alzheimer's disease. *The New England Journal of Medicine*, 248(13), 1333-1341.
- Revathikumar, P., Bergqvist, F., Gopalakrishnan, S., Korotkova, M., Jakobsson, P. J., Lampa, J., et al. (2016). Immunomodulatory effects of nicotine on interleukin 1beta activated human astrocytes and the role of cyclooxygenase 2 in the underlying mechanism. *Journal of Neuroinflammation*, 13(1), 256. doi:10.1186/s12974-016-0725-1

- Suhs, K. W., Gudi, V., Eckermann, N., Fairless, R., Pul, R., Skripuletz, T., et al. (2016). Cytokine regulation by modulation of the NMDA receptor on astrocytes. *Neuroscience Letters*, 629, 227-233. doi:10.1016/j.neulet.2016.07.016
- Teaktong, T., Graham, A., Court, J., Perry, R., Jaros, E., Johnson, M., et al. (2003). Alzheimer's disease is associated with a selective increase in alpha7 nicotinic acetylcholine receptor immunoreactivity in astrocytes. *Glia*, 41(2), 207-211. doi:10.1002/glia.10132
- Unger, C., Svedberg, M. M., Yu, W. F., Hedberg, M. M., & Nordberg, A. (2006). Effect of subchronic treatment of memantine, galantamine, and nicotine in the brain of Tg2576 (APP<sup>swe</sup>) transgenic mice. *Journal of Pharmacology and Experimental Therapeutics*, 317(1), 30-36. doi:10.1124/jpet.105.098566
- Wu, Z., Zhao, L., Chen, X., Cheng, X., & Zhang, Y. (2015). Galantamine attenuates amyloid-beta deposition and astrocyte activation in APP/PS1 transgenic mice. *Experimental Gerontology*, 72, 244-250. doi:10.1016/j.exger.2015.10.015
- Yoshizumi, M., Eisenach, J. C., & Hayashida, K. (2012). Riluzole and gabapentinoids activate glutamate transporters to facilitate glutamate-induced glutamate release from cultured astrocytes. *European Journal of Pharmacology*, 677(1-3), 87-92. doi:10.1016/j.ejphar.2011.12.015
